# Supplementary material
Source: MDPI journal article supplement (https://www.mdpi.com/2673-4583/5/1/53)
Supplement: s1 [file s1 › chemproc-1471911-supplementary.pdf]

# Europium-Doped Ceria Nanocrystals as Nanozyme Fluorescent Probes for Biosensing

***Ali Othman***

***Department of Chemistry & Biomolecular Science***

***July 1-15<sup>th</sup>, 2021***

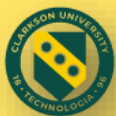

CeO<sub>2</sub> (ceria) NPs, nanoceria

## Dual oxidation state

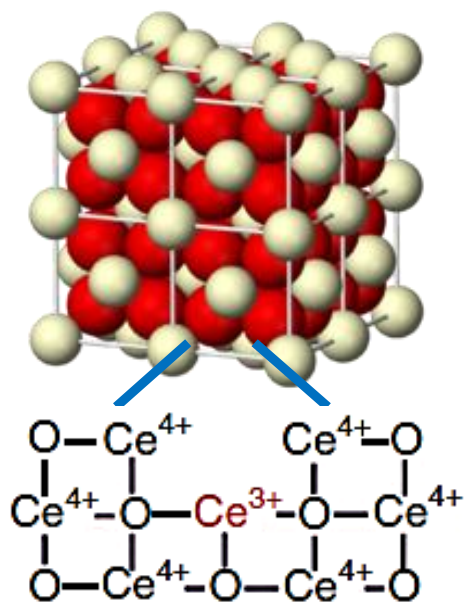

*Inter-changeable oxidation states Ce<sup>3+</sup>/Ce<sup>4+</sup>  
Surface reactivity for ox/red reactions*

## Recyclable ROS-scavenging activity

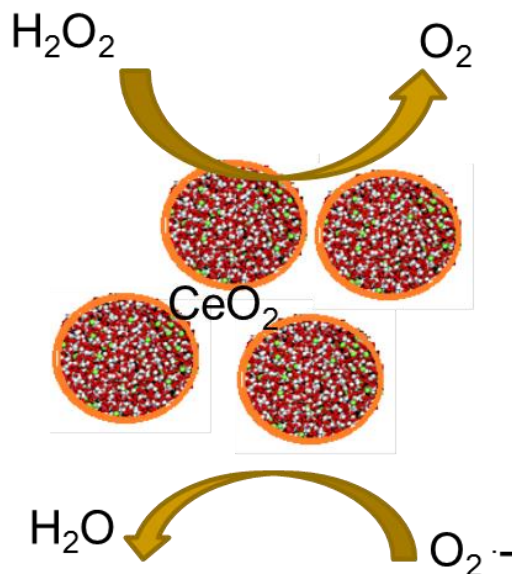

*Rich surface functionality  
Inorganic antioxidant*

## Oxygen vacancy

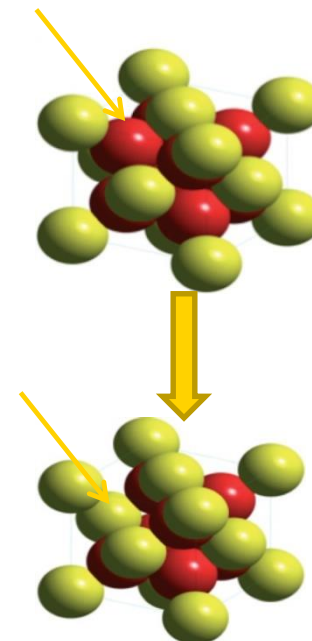

*Mobile oxygen under  
reducing/oxidizing environments  
Oxygen release/buffering capacity*

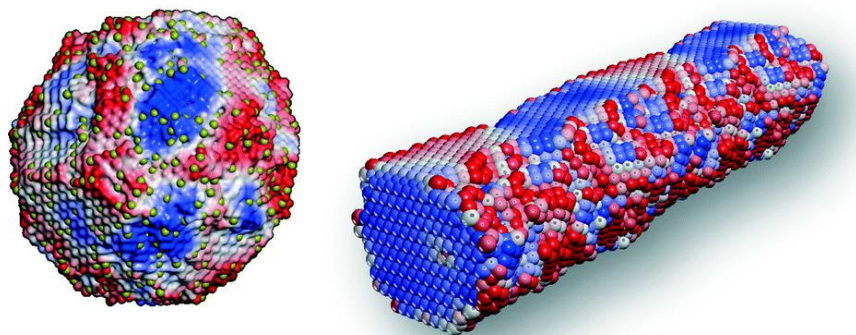

Reactivity hot spots

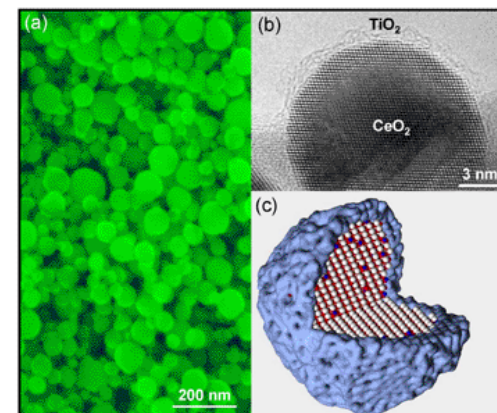

## *Enhanced properties by doping/surface coatings:*

- *Catalysis Pt, Ti*
- *Fluorescence, Eu*
- *Mechanical – coating*
- *Bio-functionalization*

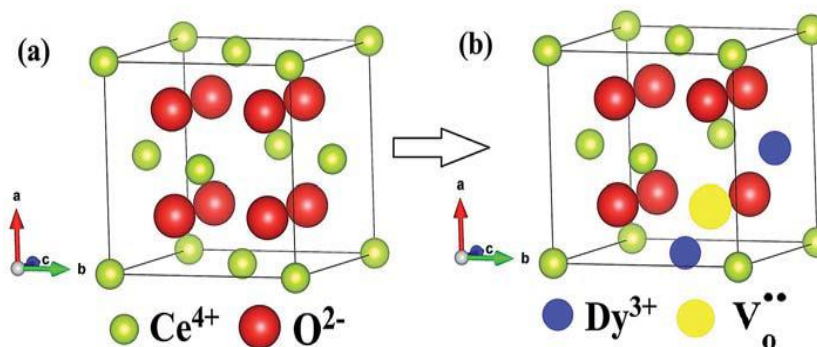

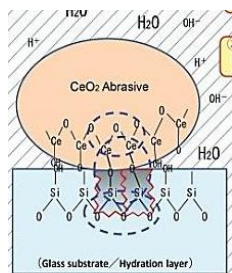

Semiconductors industry

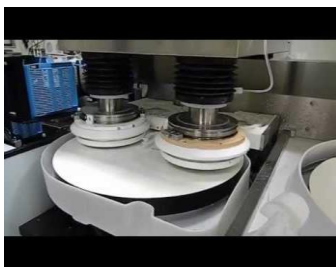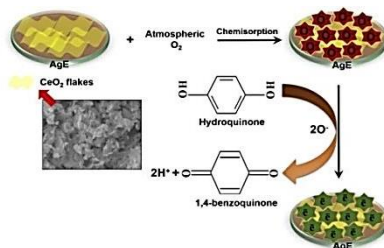

## Sensing

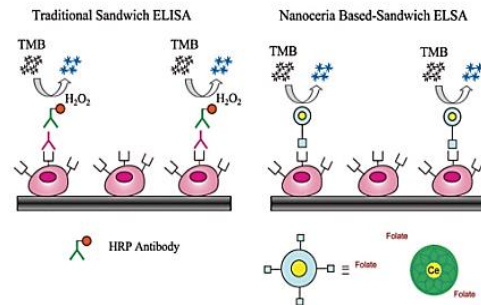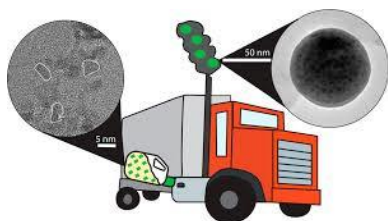

Diesel fuel-borne catalyst (FBC)

Industrial

Catalysis

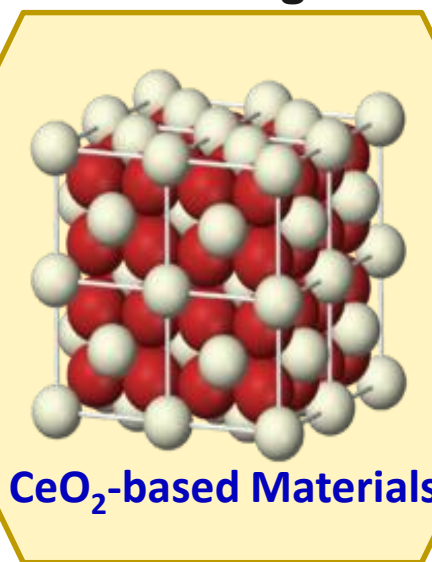

Biomedical

Bioanalytical

## Environmental

### Model Catalysts

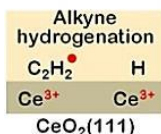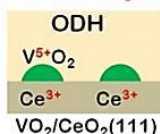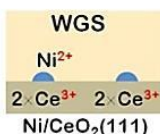

KEY FACTOR → ceria ability to stabilize reduced states

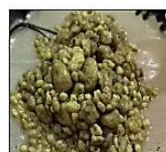

Ce<sup>4+</sup> - Bone char

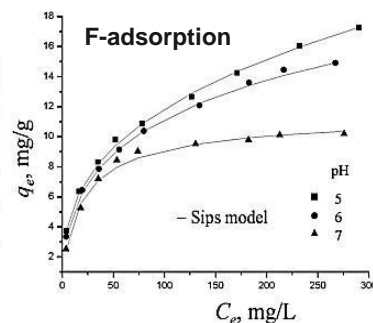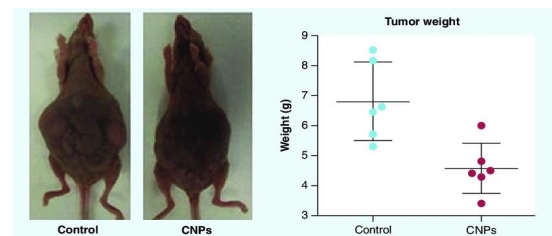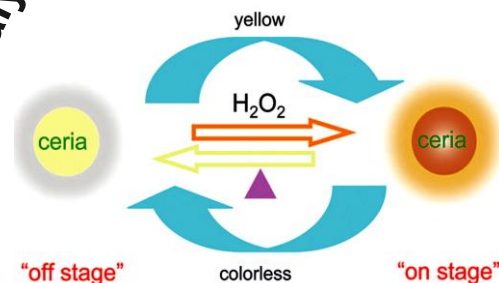

To synthesize and characterize a novel and well-dispersed europium-doped ceria nanocrystals (EuCe NCs) with self-integrated catalytic and fluorescence sensing functions

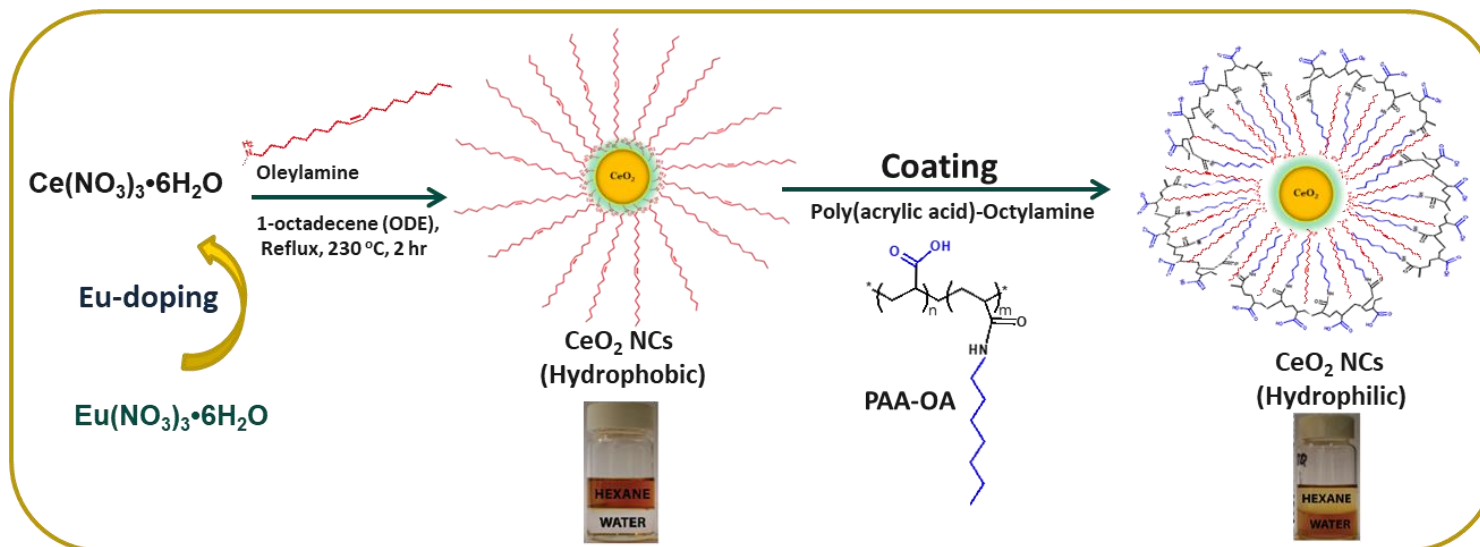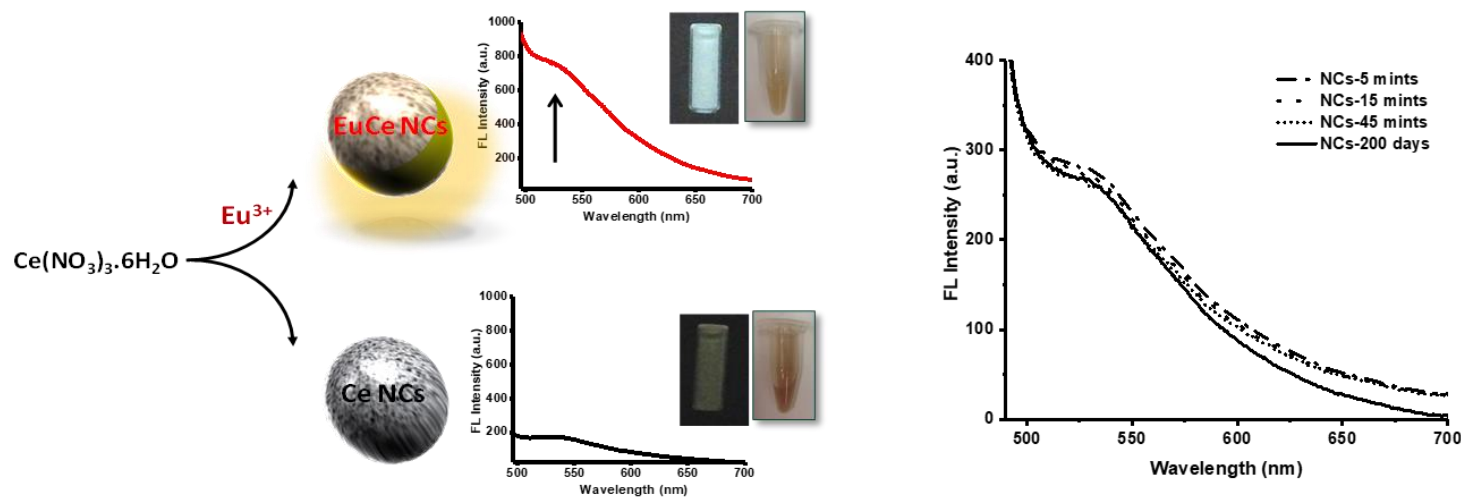

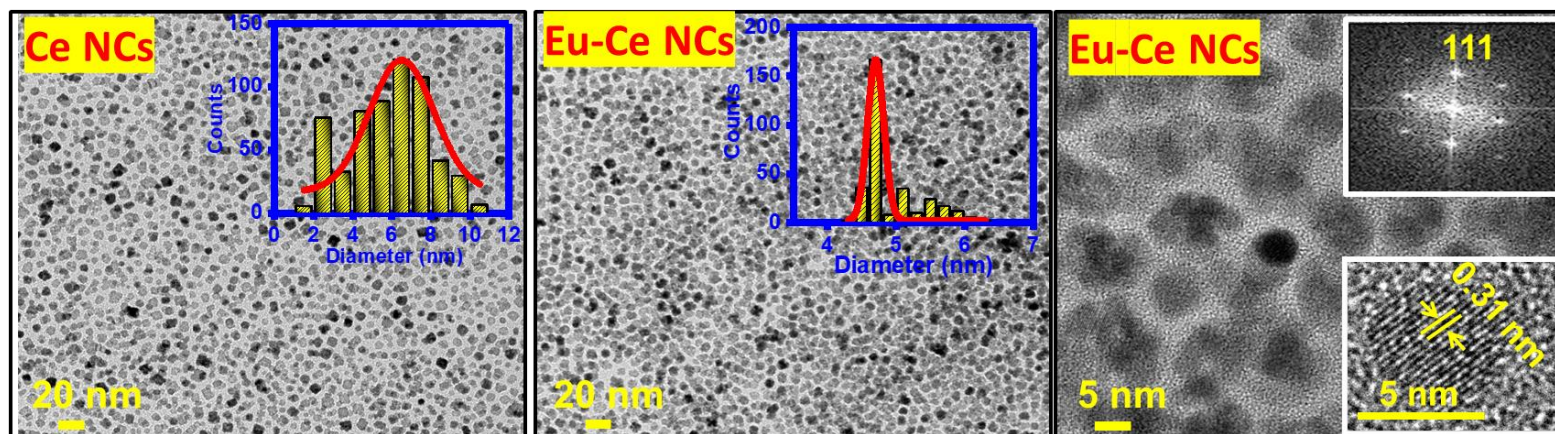

- A highly uniform nanocrystalline (NCs) with average size distribution of  $6.5 \pm 2$  nm.
- Introducing  $\text{Eu}^{3+}$  into the ceria host resulted in uniform spherical shape NCs with a slightly smaller average size distribution of  $4.7 \pm 0.1$  nm as compared to Ce NCs.
- A diffraction pattern of fcc crystals in the (111) planes.

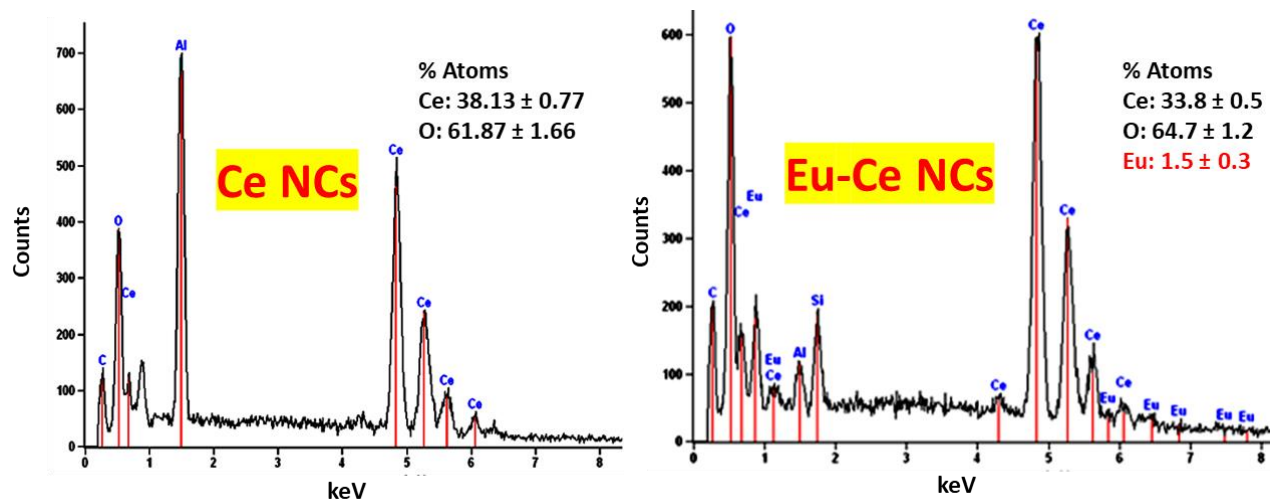

- EDS analysis confirms the presence of Eu atoms in the Eu-Ce NCs.

## Powder X-ray diffraction (PXRD)

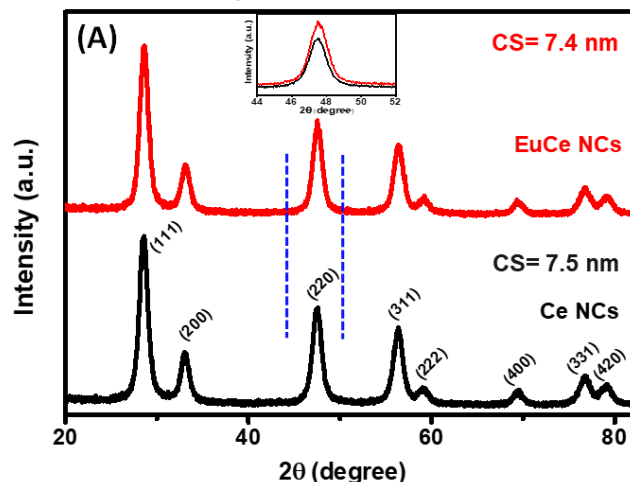

## Raman spectroscopy

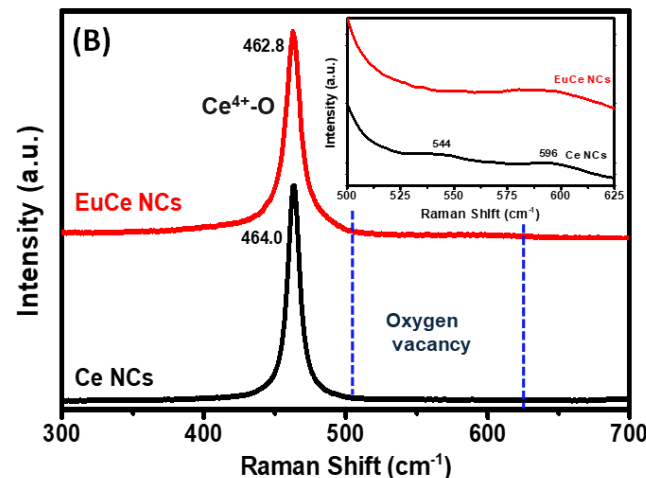

- Diffraction peaks reveal formation of a face centered cubic (fcc) structure. After incorporation of  $\text{Eu}^{3+}$  in the ceria lattice the intensity of the diffraction peaks is enhanced.
- Raman spectroscopy analysis demonstrates changes in the vibrational structure caused by doping with  $\text{Eu}^{3+}$ .

## XPS Analysis

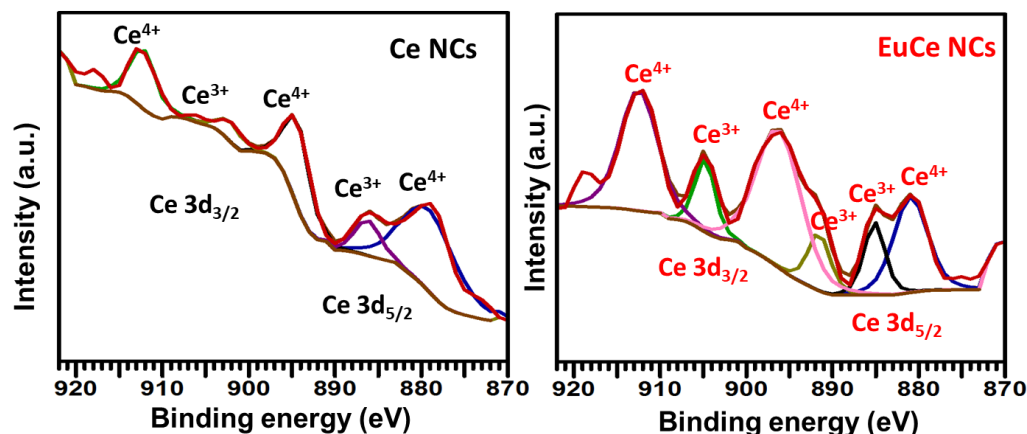

$[\text{Ce}^{3+}] =$  Ce NCs: 18.9%

EuCe NCs: 29.3%

- All peaks changed significantly suggesting changes in  $\text{Ce}^{3+}$  concentration due to doping.

## ❖ Detection of $H_2O_2$ , Glucose, and Lactate

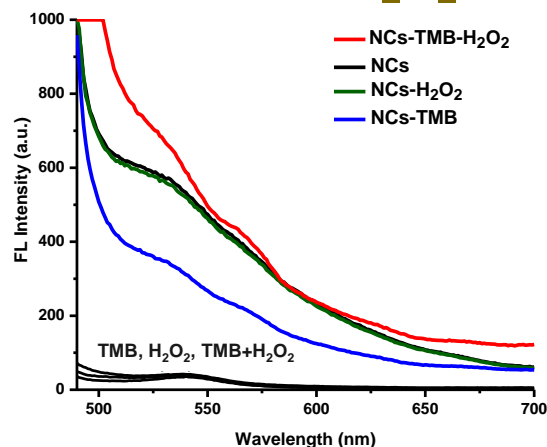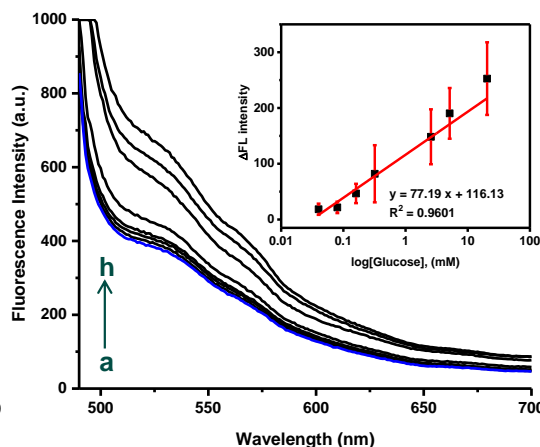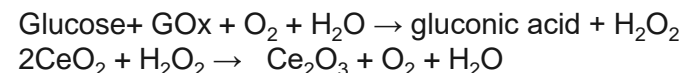

- ❑ The range of 0.04–20.48 mM
- ❑ LOD of 175  $\mu\text{M}$

Fluorescent response versus concentration of glucose:  
(a–h: 0, 0.04, 0.08, 0.16, 0.32, 2.56, 5.12, and 20.48 mM)

$\lambda_{\text{ex}} = 466 \text{ nm}$ .

- ❑ Upon addition of TMB to EuCe NCs, the FL intensity decreased. After addition of  $H_2O_2$ , the FL response was significantly enhanced and recovered, which suggests a catalytic effect of the NCs.

## ❖ Detection of Phosphatase Activity

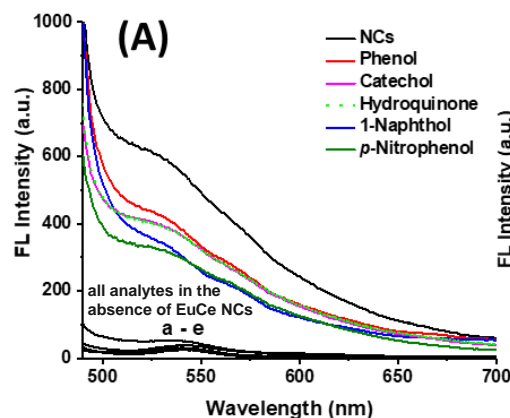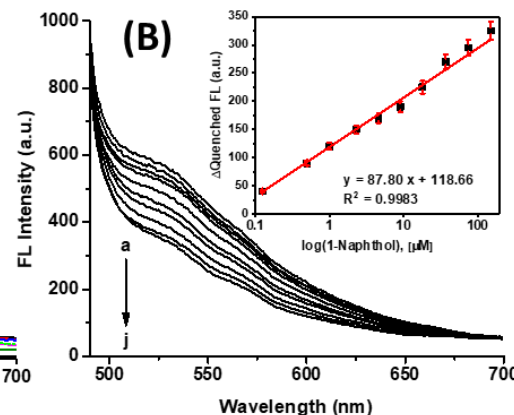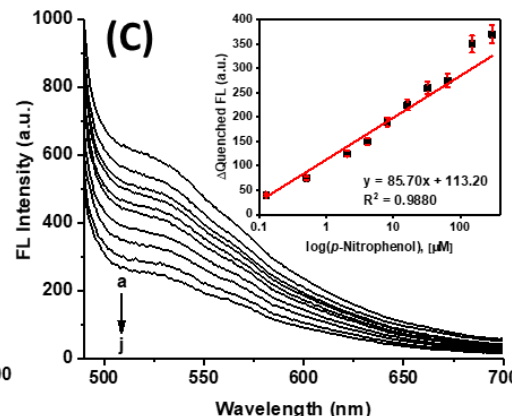

$\lambda_{\text{ex}} = 466 \text{ nm}$ .

Fluorescence spectra of EuCe NCs in the presence of 1-naphthol; (a–j) 0.125, 0.5, 1, 2.3, 4.6, 9, 18, 37, 75, and 150  $\mu\text{M}$ .  
Fluorescence spectra of EuCe NCs in the presence of p-nitrophenol. (a–j) 0.25, 0.5, 2.3, 4.6, 8, 16, 32, 65, 150, and 300  $\mu\text{M}$ .

- ❑ The EuCe NCs have also provided an excellent platform for measuring phosphatase activity.
- ❑ The detection mechanism is based on the FL quenching of EuCe NCs by the hydrolysis products of phosphatase.g

## ❖ Determination of $H_2O_2$ in Serum Samples and Selectivity Study

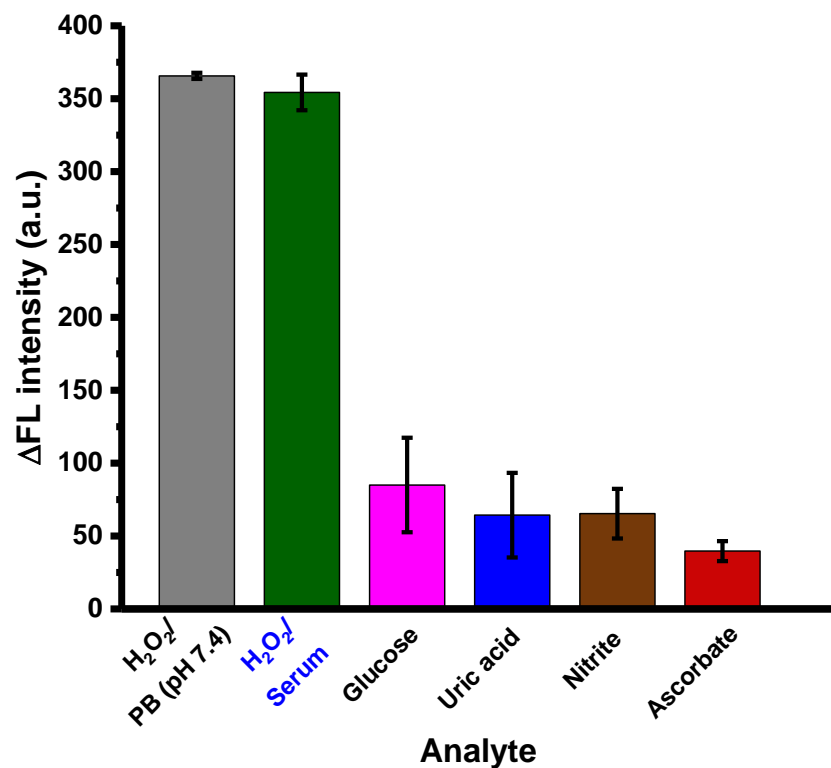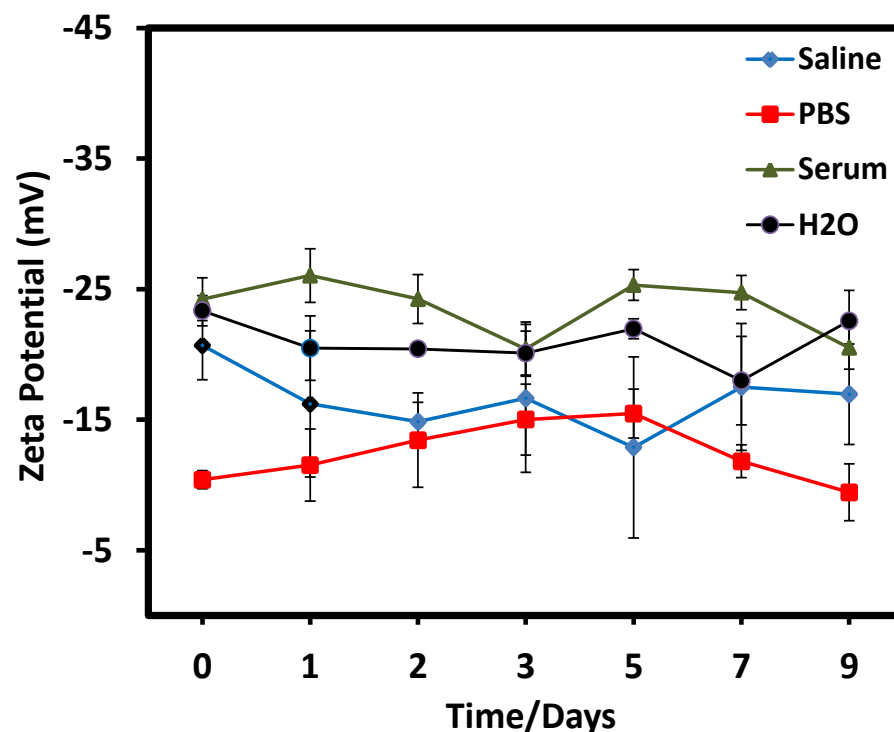

- ❑ The probe works well in a more complex sample (human serum)
- ❑ None of these species produced a significant fluorescent response

## ❖ Detection of Neurotransmitters (NTs)

- ❑ The sensing capabilities of this method were further extended to the detection of catecholamine.
- ❑ Using the oxidase like properties of the EuCe NCs to induce in situ oxidation and measurement of NTs.

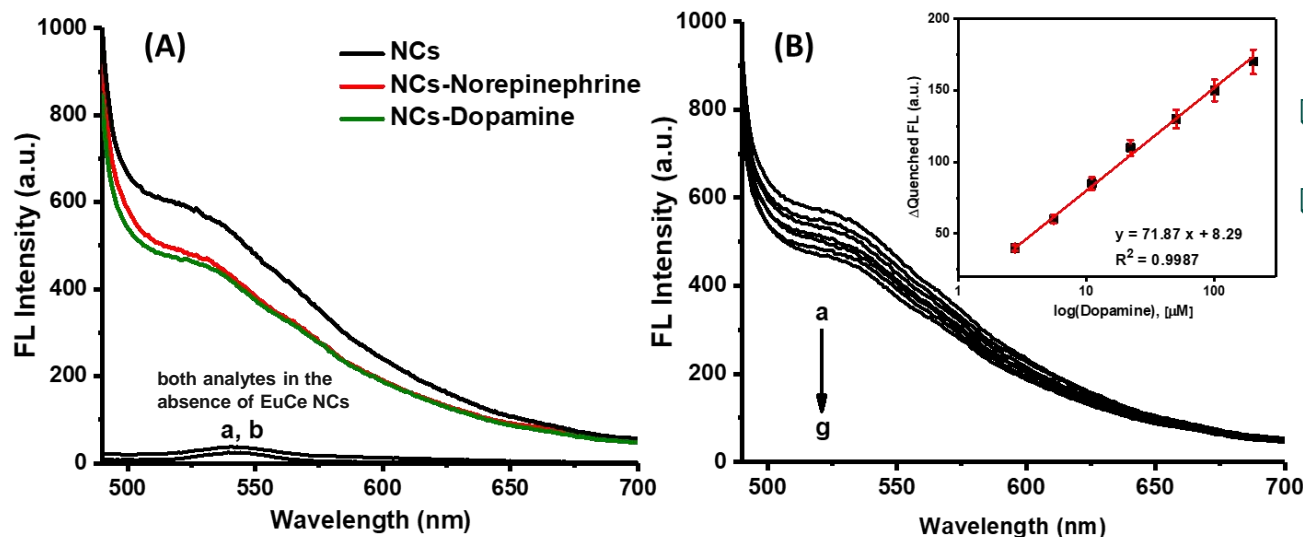

- ❑ Linear range of 2.75–200  $\mu\text{M}$  for dopamine.
- ❑ LOD : 1.0  $\mu\text{M}$

Fluorescent intensity of EuCe in DI water in the presence of dopamine;  
(a-g) 2.75, 5.5, 11, 22, 50, 100, and 200  $\mu\text{M}$ .

$\lambda_{\text{ex}} = 466 \text{ nm}$ .

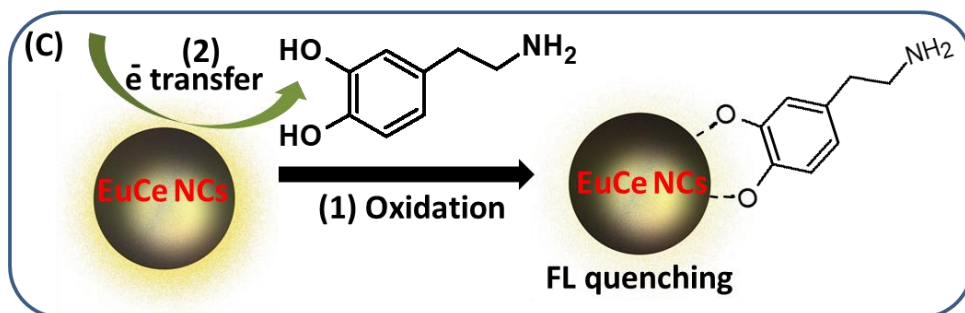

- ❑ Ceria NPs induce oxidation of the catechol ring in catechol-containing NTs, followed by surface binding of the reactive intermediates

The fluorescence images of EuCe NCs in the presence of  $H_2O_2$ , 1-naphthol, and dopamine

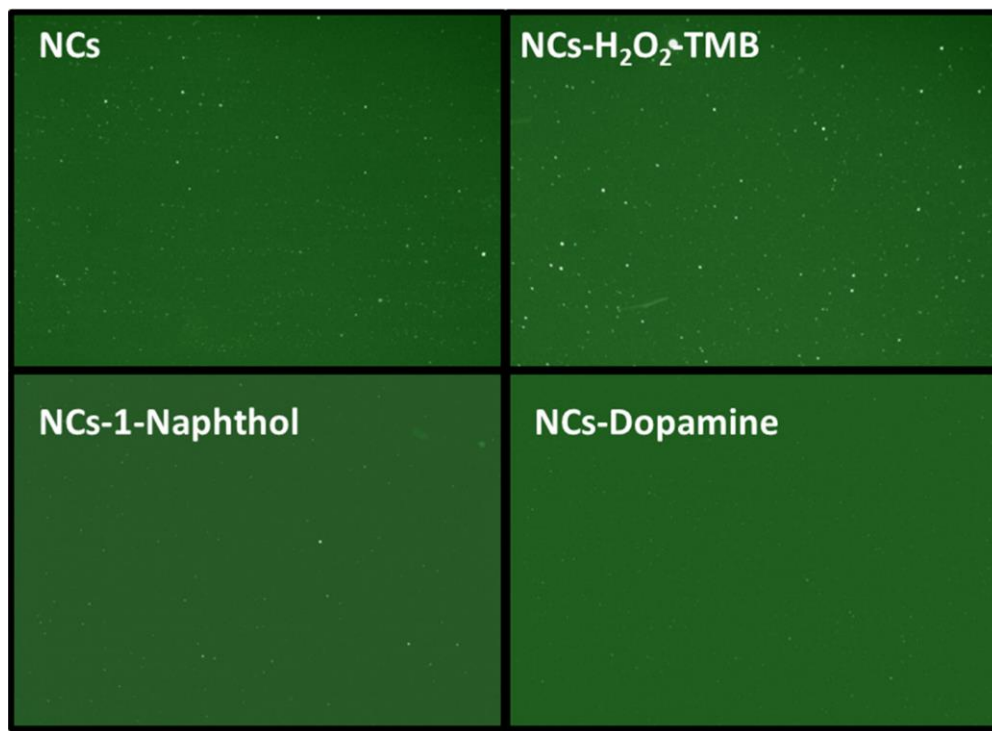

- ❑ The fluorescent intensity of EuCe NCs + TMB +  $H_2O_2$  assay was enhanced, while that of EuCe NCs-1-naphthol and EuCe NCs-dopamine was quenched when compared to EuCe NCs alone.
- ❑ This correlates well and confirms the fluorescence spectroscopy data.
- ❑ These results are promising and suggest that these EuCe NCs have potential as an imaging probe for diagnostics, and therapeutic applications
- ❑ NCs : Nanocrystals (Nanoparticles with high crystalline structure)

Fluorescence microscopy images.  $\lambda_{ex}$  = 466 nm. Magnification of the objective is 63X; the size of the particle has an average of  $4.7 \pm 0.1$  nm.

- This study described a convenient methodology for the synthesis of highly stable, uniform, water dispersed, and strongly fluorescent lanthanide-doped EuCe NCs.
- The EuCe NCs have an average size of  $\sim 5$  nm and exhibit excellent fluorescence emission characteristics and stability for several months under different buffer and pH conditions.
- The fabricated new fluorescent Eu-doped  $\text{CeO}_2$  NPs was demonstrated with imaging and sensing capabilities for applications in the bioanalytical/sensing & biomedical field.
- The EuCe NCs was demonstrated as a nanoenzyme fluorescent probe to monitor  $\text{H}_2\text{O}_2$  and quantify enzymatic transformation of oxidase enzyme reactions (i.e., glucose and lactate).
- We also developed a approach for measuring ALP activity by monitoring the quenching fluorescent intensity of the NCs in the presence of 1-naphthyl phosphate.
- Biologically relevant NTs (dopamine and norepinephrine) was also quantified using the oxidative capability of the EuCe NCs as fluorescent changes in the NC's properties upon oxidative induced reconfiguration of the NC's surface.
- We expect the promising potential of this material to open new ways to design nanobiosensors for bioimaging and biocatalytic applications.

- Prof. Silvana Andreescu

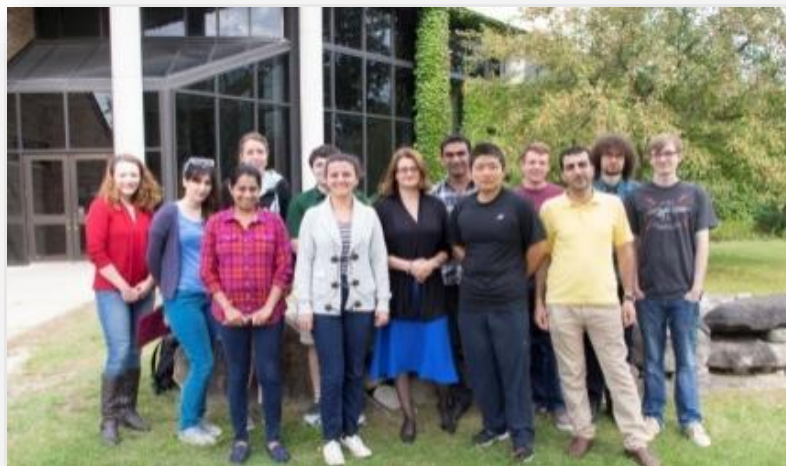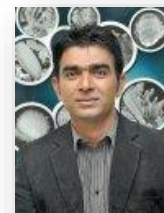

**Dr. Akhtar Hayat**

Visiting researcher-Andreescu lab

Interdisciplinary Research Centre in  
Biomedical Materials/COMSAT Institute  
of Information Technology (CIIT),  
Pakistan

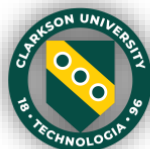

**Clarkson**<sup>TM</sup>  
SCHOOL OF ARTS & SCIENCES

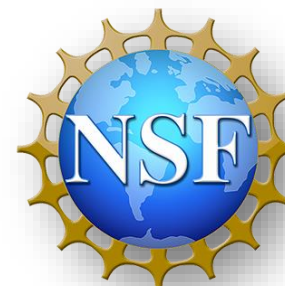

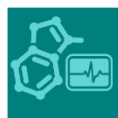

***chemosensors***

an Open Access Journal by MDPI

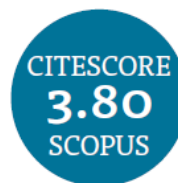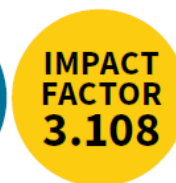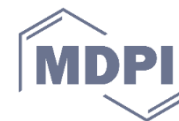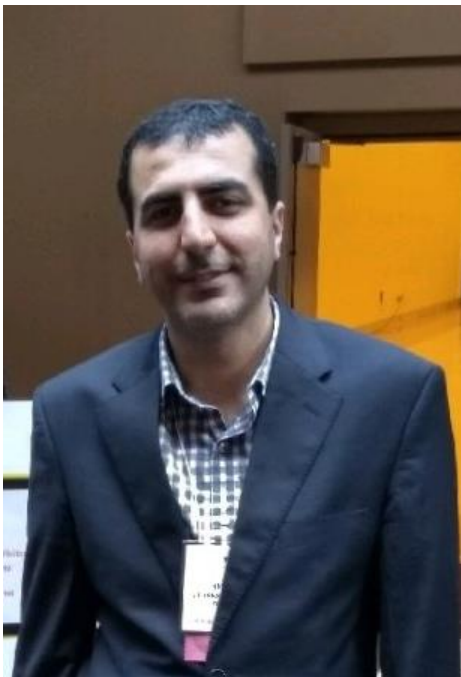

**Ali Othman, PhD**

Department of Chemistry and Biomolecular Science,  
Clarkson University, Potsdam, NY, USA



***chemosensors***

an Open Access Journal by MDPI

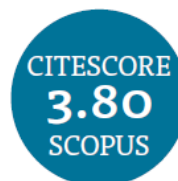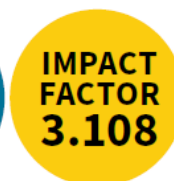

### **Journal's Aims and Scope:**

Chemosensors (ISSN 2227-9040) is an open access journal that provides an advanced forum for science and technology of chemical sensors and related analytical methods, the scope includes:

New chemical sensors design

Electrochemical devices, potentiometric sensor, redox electrode

Optical chemical sensors

Analytical methods, modeling, readout and software for chemical sensors

Sensors materials

Please click on the link for more information: <https://www.mdpi.com/journal/chemosensors>

### **Author Benefits:**

1. Rapid publication, submission to first decision time 15.1 days, acceptance to publication 2.7 days;
2. Open Access Unlimited and free access for readers, no Copyright Constraints;
3. Impact Factor 3.108 (2019 Journal Citation Reports);
4. Coverage by SCIE (Clarivate Analytics), Scopus (Elsevier), Chemical Abstracts (ACS) and in Inspec;
5. No Space Constraints, No Extra Space or Color Charges.

Homepage: <https://www.mdpi.com/journal/chemosensors>

@chemosens\_MDPI on Twitter

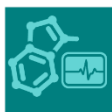

**chemosensors**

an Open Access Journal by MDPI

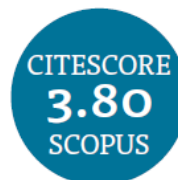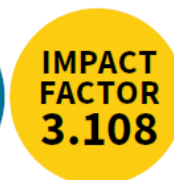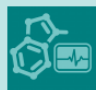

**chemosensors**

an Open Access Journal by MDPI

## Nanomaterials Based on Bio / Chemical Sensors

**Guest Editor**  
Dr. Ali Othman

**Deadline**  
15 July 2021

IMPACT  
FACTOR  
3.108

**Special Issue**

Invitation to submit

[mdpi.com/si/75355](https://www.mdpi.com/si/75355)

### Call for Paper

- Nanomaterials, nanocomposites, and hybrid materials for bio/chemical sensors;
- Engineering, functionalization, and characterization of novel nanomaterials;
- Nanomaterials-based environmental, biomedical, food packaging, and bioanalytical sensors;
- Smart nanomaterials for wearable bio/chemical sensors/devices;
- Emerging applications of nanoscale-based materials for bio/chemical sensors

### Special Issue: Nanomaterials Based on Bio/Chemical Sensors

[https://www.mdpi.com/journal/chemosensors/special\\_issues/NBBCS](https://www.mdpi.com/journal/chemosensors/special_issues/NBBCS)

Contact us:  
[aothman@clarkson.edu](mailto:aothman@clarkson.edu)
